# Supplementary material for: Effective adsorption of Pb(ii) from wastewater using MnO2 loaded MgFe-LD(H)O composites: adsorption behavior and mechanism
Source: Royal Society of Chemistry journal article supplement (doi:10.1039/d3ra03035k), 2023-01-01
Supplement: d3ra03035k1.pdf [file d3ra03035k1.pdf]

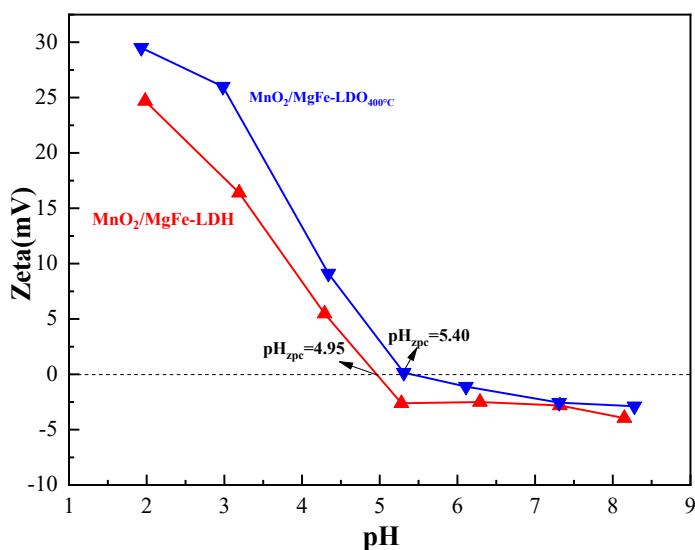

Figure 1. pH-zeta of MnO<sub>2</sub>/MgFe-LDH and MnO<sub>2</sub>/MgFe-LDO<sub>400</sub>°C composites.

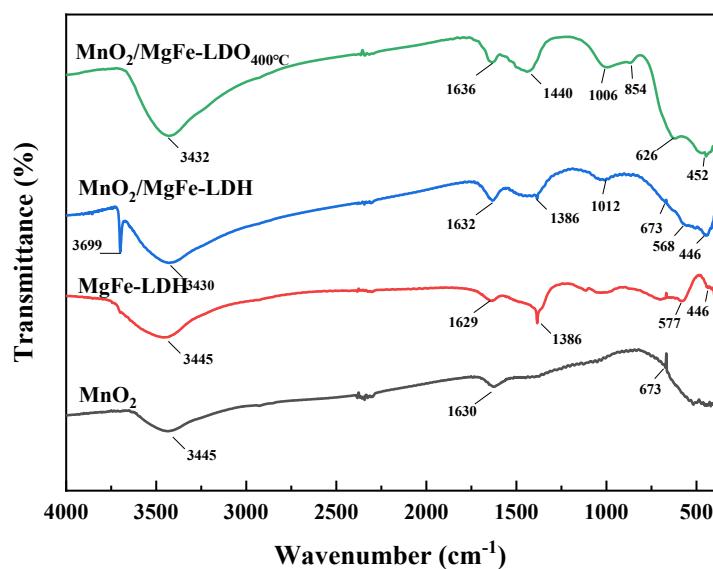

Figure 2. FT-IR diagram of MnO<sub>2</sub>, MgFe-LDH, MnO<sub>2</sub>/MgFe-LDH and MnO<sub>2</sub>/MgFe-LDO<sub>400</sub>°C

Table 1 Analysis of specific surface area and pore size of samples

| 样品                                           | S <sub>BET</sub> /(m <sup>2</sup> /g) | V <sub>total</sub> /(cm <sup>3</sup> /g) | D <sub>BET</sub> /nm |
|----------------------------------------------|---------------------------------------|------------------------------------------|----------------------|
| MnO <sub>2</sub>                             | 111.385                               | 0.114                                    | 4.096                |
| MgFe-LDH                                     | 154.005                               | 0.390                                    | 10.135               |
| MnO <sub>2</sub> /MgFe-LDH                   | 226.794                               | 0.388                                    | 6.841                |
| MnO <sub>2</sub> /MgFe-LDO <sub>400</sub> °C | 153.455                               | 0.589                                    | 15.349               |

Material synthesis methods:

The co-precipitation approach was used to prepare  $\text{MnO}_2/\text{MgFe-LDH}$ . To prepare the mixed aqueous solution, 4.615 g of  $\text{Mg}(\text{NO}_3)_2 \cdot 6\text{H}_2\text{O}$  and 2.424 g of  $\text{Fe}(\text{NO}_3)_3 \cdot 9\text{H}_2\text{O}$  were dissolved in 300 mL of DI water. Under vigorous stirring, NaOH was slowly added dropwise to the mixed solution. The pH of the reaction solution was maintained at  $11 \pm 0.5$  by controlling the lowering speed of the NaOH solution. After 48 h of ageing at 60 °C, the  $\text{KMnO}_4$  and  $\text{MnCl}_2 \cdot 4\text{H}_2\text{O}$  were carefully added, followed by 4 h of stirring at 30 °C. After ageing for 12 h, the slurry was centrifuged and rinsed numerous times with DI water until the supernatant was neutral. The  $\text{MnO}_2/\text{MgFe-LDH}$  was then dried at 70 °C, and crushed into a powder. Finally, a portion of the  $\text{MnO}_2/\text{MgFe-LDH}$  powder was calcined at 400°C for 5 h in a tube furnace to produce  $\text{MnO}_2/\text{MgFe-LDO}_{400^\circ\text{C}}$ .
